# Supplementary material for: Combined Treatment with L-Carnitine and Nicotinamide Riboside Improves Hepatic Metabolism and Attenuates Obesity and Liver Steatosis
Source: MDPI journal article supplement (doi:10.3390/ijms20184359), 2019-09-05
Supplement: s1 [file s1]

## Supplemental table 1

### Chemokines

|        | HFD vs Chow |         | LC vs HFD |         | NR vs HFD |         | COMBI vs HFD |         |
|--------|-------------|---------|-----------|---------|-----------|---------|--------------|---------|
|        | z-score     | p-value | z-score   | p-value | z-score   | p-value | z-score      | p-value |
| CCL2   | 1,4         | 3,4E-04 | na        | na      | na        | na      | na           | na      |
| CCL5   | 2,6         | 8,0E-10 | na        | na      | na        | na      | na           | na      |
| Ccl6   | 2,4         | 7,1E-04 | na        | na      | na        | na      | na           | na      |
| CXCL2  | 2,5         | 1,9E-04 | na        | na      | na        | na      | na           | na      |
| Cxcl3  | 3,1         | 2,3E-05 | na        | na      | na        | na      | na           | na      |
| CXCL3  | 3,1         | 2,3E-05 | na        | na      | na        | na      | na           | na      |
| CXCL12 | 3,7         | 1,8E-09 | na        | na      | na        | na      | na           | na      |

### Cytokines

|         | HFD vs Chow |         | LC vs HFD |         | NR vs HFD |         | COMBI vs HFD |         |
|---------|-------------|---------|-----------|---------|-----------|---------|--------------|---------|
|         | z-score     | p-value | z-score   | p-value | z-score   | p-value | z-score      | p-value |
| IL1A    | 5,5         | 7,0E-13 | na        | na      | na        | na      | 0,1          | 3,7E-02 |
| IL1B    | 6,9         | 1,8E-31 | na        | na      | -1,7      | 1,9E-02 | -0,2         | 1,6E-03 |
| IL1RN   | -4,2        | 3,8E-05 | na        | na      | na        | na      | na           | na      |
| IL2     | 6,0         | 6,0E-21 | na        | na      | na        | na      | na           | na      |
| IL3     | -0,7        | 2,3E-03 | na        | na      | na        | na      | -1,0         | 4,3E-03 |
| IL4     | 3,6         | 4,4E-26 | na        | na      | na        | na      | -2,0         | 5,8E-04 |
| IL5     | 5,0         | 3,4E-18 | na        | na      | na        | na      | na           | na      |
| IL6     | 3,5         | 4,4E-35 | na        | na      | -1,8      | 7,4E-02 | -1,0         | 5,6E-03 |
| IL7     | 2,2         | 5,2E-05 | na        | na      | na        | na      | na           | na      |
| IL9     | 2,4         | 4,8E-01 | na        | na      | na        | na      | na           | na      |
| IL10    | 1,0         | 2,6E-14 | na        | na      | na        | na      | -2,8         | 6,4E-04 |
| IL10RA  | -3,9        | 1,2E-32 | 0,0       | 4,4E-02 | na        | na      | na           | na      |
| IL12B   | 2,1         | 3,4E-03 | na        | na      | na        | na      | na           | na      |
| IL13    | 4,0         | 5,3E-26 | na        | na      | na        | na      | -1,6         | 3,7E-04 |
| IL15    | 4,2         | 2,7E-12 | na        | na      | na        | na      | na           | na      |
| IL17A   | 3,3         | 8,1E-13 | na        | na      | -0,9      | 3,9E-02 | 0,2          | 2,7E-02 |
| IL18    | 3,8         | 9,7E-04 | na        | na      | na        | na      | na           | na      |
| IL21    | 3,4         | 2,2E-07 | na        | na      | na        | na      | na           | na      |
| IL27    | 4,1         | 7,1E-04 | na        | na      | na        | na      | na           | na      |
| IFNA2   | 4,8         | 1,3E-03 |           | 1,5E-02 | na        | na      | na           | na      |
| IFNA4   | na          | na      | na        | na      | na        | na      | na           | na      |
| IFNB1   | 4,5         | 1,8E-14 | na        | na      | na        | na      |              | 3,1E-02 |
| IFNE    | 2,4         | 1,8E-03 | na        | na      | na        | na      | na           | na      |
| IFNG    | 7,2         | 4,9E-50 | na        | na      | na        | na      | 0,2          | 4,9E-02 |
| IFNL1   | 3,3         | 3,0E-03 | na        | na      | na        | na      | na           | na      |
| IFNL3   | 2,4         | 2,4E-02 | na        | na      | na        | na      | na           | na      |
| IFNL3   | 2,4         | 2,4E-02 | na        | na      | na        | na      | na           | na      |
| IFNL3   | 2,4         | 2,4E-02 | na        | na      | na        | na      | na           | na      |
| IFNL3   | 2,4         | 2,4E-02 | na        | na      | na        | na      | na           | na      |
| CSF1    | 4,5         | 5,1E-18 | na        | na      | na        | na      | -1,2         | 4,3E-02 |
| CSF2    | 7,2         | 1,2E-36 | na        | na      | na        | na      | na           | na      |
| CSF3    | 2,3         | 7,9E-19 | na        | na      | na        | na      | na           | na      |
| MIF     | 3,3         | 9,0E-04 | na        | na      | na        | na      | na           | na      |
| OSM     | 2,4         | 5,1E-17 | na        | na      | na        | na      | 0,2          | 1,7E-02 |
| TNF     | 7,2         | 2,3E-46 | na        | na      | na        | na      | -0,3         | 4,2E-04 |
| TNFSF11 | 4,9         | 5,4E-23 | na        | na      | -0,4      | 2,1E-02 | -2,4         | 2,3E-02 |

### TLR-signalling

|       | HFD vs Chow |         | LC vs HFD |         | NR vs HFD |         | COMBI vs HFD |         |
|-------|-------------|---------|-----------|---------|-----------|---------|--------------|---------|
|       | z-score     | p-value | z-score   | p-value | z-score   | p-value | z-score      | p-value |
| TLR2  | 3,0         | 7,3E-04 | na        | na      | na        | na      | na           | na      |
| TLR3  | 4,7         | 2,5E-07 | na        | na      | na        | na      | na           | na      |
| TLR4  | 5,0         | 8,6E-15 | na        | na      | na        | na      | na           | na      |
| TLR5  | 3,1         | 7,2E-03 | na        | na      | na        | na      | na           | na      |
| TLR7  | 5,5         | 7,3E-05 | na        | na      | na        | na      | na           | na      |
| TLR9  | 4,5         | 1,9E-09 | na        | na      | na        | na      | na           | na      |
| MYD88 | 5,5         | 5,8E-14 | na        | na      | na        | na      | na           | na      |

# Inflammation

JUN  
JUNB  
JUND  
ITK  
MAPK8  
Nfat (family)  
NFAT5  
NFATC1  
NFATC2IP  
NFATC3  
NFATC4  
NFATC2  
NFkB (family)  
NFKB1  
NFKB2  
RELA  
NFKBIA  
NFKB1  
STAT1  
STAT3  
STAT4  
STAT5A  
STAT5B  
SIRT2  
HNF1A  
Irgm1

| HFD vs Chow |         | LC vs HFD |         | NR vs HFD |         | COMBI vs HFD |         |
|-------------|---------|-----------|---------|-----------|---------|--------------|---------|
| z-score     | p-value | z-score   | p-value | z-score   | p-value | z-score      | p-value |
| 4,4         | 4,4E-21 | na        | na      | na        | na      | 0,1          | 8,0E-03 |
| 3,9         | 1,4E-06 | na        | na      | na        | na      |              | 1,3E-02 |
| 0,7         | 5,4E-05 | na        | na      | na        | na      | na           | na      |
| 3,0         | 1,5E-05 | na        | na      | na        | na      | na           | na      |
| 2,3         | 8,5E-05 | na        | na      | na        | na      | na           | na      |
| 4,2         | 3,7E-05 | na        | na      | na        | na      | na           | na      |
| na          | 1,1E-02 | na        | na      | na        | na      | na           | na      |
| 2,0         | 6,6E-04 | na        | na      | na        | na      | na           | na      |
| na          | na      | na        | na      | na        | na      | na           | na      |
| na          | na      | na        | na      | na        | na      | na           | na      |
| na          | na      | na        | na      | na        | na      | na           | na      |
| 2,4         | 6,7E-05 | na        | na      | na        | na      | na           | na      |
| 2,0         | 2,5E-03 | na        | na      | na        | na      | na           | 1,0E-02 |
| 3,9         | 2,4E-09 | na        | na      | na        | na      | na           | na      |
| 0,1         | 2,2E-02 | na        | na      | na        | na      | na           | na      |
| 3,9         | 7,3E-08 | na        | na      | na        | na      | na           | na      |
| 3,8         | 6,9E-18 | na        | na      | na        | na      | na           | na      |
| 3,9         | 2,4E-09 | na        | na      | na        | na      | na           | na      |
| 6,1         | 4,8E-16 | na        | na      | na        | na      | na           | na      |
| 3,0         | 1,6E-25 | na        | na      | na        | na      | -0,9         | 3,3E-02 |
| 5,1         | 5,0E-08 | na        | na      | na        | na      | na           | na      |
| 0,9         | 4,3E-08 | na        | na      | na        | na      | -2,2         | 9,5E-02 |
| 0,2         | 1,2E-04 | na        | na      | na        | na      | -2,0         | 3,9E-02 |
| -3,2        | 9,4E-05 | na        | na      | na        | na      | 2,2          | 1,3E-06 |
| -2,9        | 2,3E-12 | na        | 1,2E-02 | 1,7       | 1,1E-04 | 0,8          | 4,0E-05 |
| -4,3        | 4,4E-08 | na        | na      | na        | na      | na           | na      |

# Oxidative stress response

Nos  
NOS2  
NOS3  
CYP2E1  
NADPH oxidase  
NCF2  
NOX1  
NOX3  
NOX4  
GPX1  
COL18A1  
SOD  
SOD1  
SOD2  
SOD3  
NFE2L2 (NRF2)  
POR  
DUSP1  
CAT  
GSTZ1  
GSTA1

| HFD vs Chow |          | LC vs HFD |         | NR vs HFD |          | COMBI vs HFD |          |
|-------------|----------|-----------|---------|-----------|----------|--------------|----------|
| z-score     | p-value  | z-score   | p-value | z-score   | p-value  | z-score      | p-value  |
| na          | na       | na        | na      | na        | na       | na           | na       |
| 2,9         | 6,45E-11 | na        | na      | na        | na       | -0,9         | 1,82E-02 |
| -0,3        | 1,59E-06 | na        | na      | na        | na       | na           | na       |
| 2,1         | 6,19E-06 | na        | na      | na        | na       | na           | na       |
| 2,4         | 1,82E-02 | na        | na      | na        | na       | na           | na       |
| na          | na       | na        | na      | na        | na       | na           | na       |
| na          | na       | na        | na      | na        | na       | na           | na       |
| na          | na       | na        | na      | na        | na       | na           | na       |
| 1,3         | 1,29E-02 | na        | na      | na        | na       | na           | 2,49E-02 |
| -2,4        | 2,63E-05 | na        | na      | na        | na       | na           | na       |
| -3,4        | 1,28E-10 | na        | na      | na        | na       | na           | na       |
| -2,6        | 7,03E-04 | na        | na      | na        | na       | na           | na       |
| -1,2        | 8,64E-08 | na        | na      | na        | na       | na           | 2,50E-02 |
| 1,0         | 1,12E-05 | na        | na      | na        | na       | na           | 2,37E-02 |
| na          | na       | na        | na      | na        | na       | na           | na       |
| na          | na       | na        | na      | na        | na       | na           | na       |
| 1,5         | 3,89E-24 | na        | na      | na        | 5,68E-03 | -2,0         | 2,00E-09 |
| -0,2        | 2,12E-13 | na        | na      | na        | na       | na           | na       |
| -2,8        | 7,81E-03 | na        | na      | na        | na       | na           | na       |
| na          | 2,35E-02 | na        | na      | na        | na       | na           | na       |
| na          | na       | na        | na      | na        | na       | na           | 2,23E-02 |
