# Supplementary figures and images for: Combined Treatment with L-Carnitine and Nicotinamide Riboside Improves Hepatic Metabolism and Attenuates Obesity and Liver Steatosis
Source: MDPI journal article supplement (doi:10.3390/ijms20184359), 2019-09-05

Supplemental figure 1

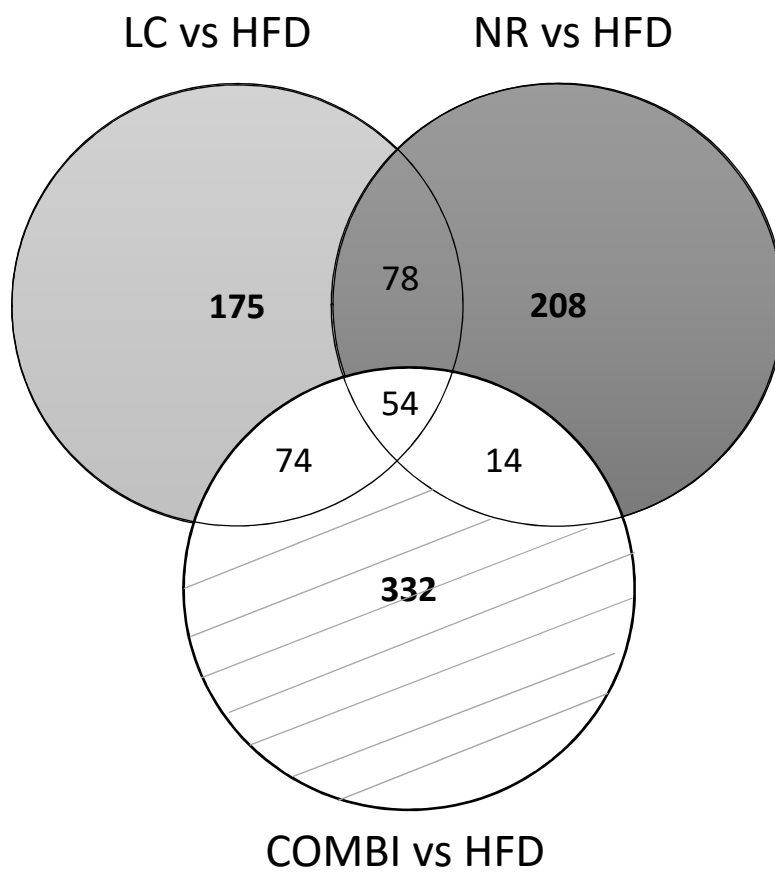

Supplement: s1 [file s1]
